# Supplementary material for: Left Ventricular Diastolic Dysfunction Is Not Associated With Pulmonary Edema in Septic Patients. A Prospective Observational Cohort Study
Source: Frontiers journal article supplement (doi:10.3389/fcvm.2022.900850), 2022-07-01
Supplement: Data_Sheet_1.PDF [file Data_Sheet_1.PDF]

### Supplement 1. Ultrasound examination method

| Parameter                          | Probe        | Mode               | View                                                  | Calculation                                                                                                                            |
|------------------------------------|--------------|--------------------|-------------------------------------------------------|----------------------------------------------------------------------------------------------------------------------------------------|
| <b>Echocardiography</b>            |              |                    |                                                       |                                                                                                                                        |
| Ejection Fraction                  | Sector probe | B-mode             | A4C; A2C                                              | Biplane method of discs; modified Simpson's rule                                                                                       |
| Stroke volume                      | Sector probe | B-mode; PW Doppler | PLAX; A5C                                             | Left ventricular outflow tract (LVOT) diameter (cm);<br>LVOT subvalvular velocity time integral (cm)                                   |
| Mitral inflow pattern              | Sector probe | PW Doppler         | A4C                                                   | E-wave; A-wave ( $\text{m s}^{-1}$ )<br>Deceleration time of the E-wave (ms)                                                           |
| Mitral annular tissue velocity     | Sector probe | Tissue Doppler     | A4C                                                   | Peak lateral and septal velocity during early and the atrial<br>filling phase (lateral and septal e'- and a'-wave; $\text{m s}^{-1}$ ) |
| Left atrial maximum volume index   | Sector probe | B-mode             | A4C; A2C                                              | Biplane method of discs; modified Simpson's rule;<br>indexed to Body surface area ( $\text{ml m}^{-2}$ )                               |
| Tricuspid regurgitation velocity   | Sector probe | CW Doppler         | A4C                                                   | Maximum velocity ( $\text{m s}^{-1}$ )                                                                                                 |
| <b>Lung ultrasound</b>             |              |                    |                                                       |                                                                                                                                        |
| Lung ultrasound score <sup>1</sup> | Curved array | B-mode             | longitudinal view, ICS 3/4,<br>ICS 6/7 left and right | Number of B-lines during one full breathing cycle.<br>(ICS Score 0-8; total score 0-32)                                                |

Supplement 1. A2C/A4C/A5C = Apical 2/4/5-chamber view; PLAX = parasternal long axis; PW = pulsed wave; CW = continuous wave; ICS = intercostal space.

<sup>1</sup> Enghard P, Rademacher S, Nee J, Hasper D, Engert U, Jorres A, et al. Simplified lung ultrasound protocol shows excellent prediction of extravascular lung water in ventilated intensive care patients. Crit Care. 2015 Feb 6;19:36.

Kahl et al.: Diastolic dysfunction and pulmonary edema during sepsis  
Supplemental material 2: PRICES Checklist<sup>1</sup>

|      | Checklist items                                            | LV<br>systolic<br>function | RV<br>function | LV<br>diastolic<br>function | Fluid<br>management |
|------|------------------------------------------------------------|----------------------------|----------------|-----------------------------|---------------------|
| A1   | Research vs clinical study                                 |                            |                |                             |                     |
|      | • Research study                                           |                            |                | X                           |                     |
|      | • Clinical study                                           |                            |                |                             |                     |
| A2   | Study information                                          |                            |                |                             |                     |
|      | • Specific study type                                      |                            |                | X                           |                     |
|      | • State study design                                       |                            |                | X                           |                     |
|      | • Report sample size                                       |                            |                | X                           |                     |
| A3   | Patient information                                        |                            |                |                             |                     |
|      | • Age                                                      |                            |                | X                           |                     |
|      | • Gender                                                   |                            |                | X                           |                     |
|      | • Height & weight (or BMI)                                 |                            |                | X                           |                     |
|      | Comorbidities                                              |                            |                |                             |                     |
|      | • Ischaemic heart disease                                  |                            |                | X                           |                     |
|      | • Atrial fibrillation                                      |                            |                | X                           |                     |
|      | • Hypertension                                             |                            |                | X                           |                     |
|      | • HFpEF                                                    |                            |                |                             |                     |
|      | • HFrEF                                                    |                            |                |                             |                     |
|      | • Pacemaker implant present                                |                            |                | X                           |                     |
|      | • COPD or pulmonary hypertension                           |                            |                | X                           |                     |
|      | • CKD or hemodialysis                                      |                            |                | X                           |                     |
| A4   | Echocardiography information                               |                            |                |                             |                     |
|      | • Type of echo (TTE or TEE)                                |                            |                | X                           |                     |
|      | • Indicate if data collected at end-expiration             |                            |                |                             |                     |
|      | • No. of beats used for averaging                          |                            |                | X                           |                     |
|      | • Report vendor of ultrasound machine                      |                            |                | X                           |                     |
|      | • Indicate if airway pressure trace displayed on screen    |                            |                |                             |                     |
| A5   | Clinical information at the time of echo                   |                            |                |                             |                     |
| A5.1 | Ventilation                                                |                            |                |                             |                     |
|      | • Mode of ventilation                                      |                            |                | X                           |                     |
|      | • Tidal volume                                             |                            |                |                             |                     |
|      | • Plateau pressure                                         |                            |                |                             |                     |
|      | • PEEP                                                     |                            |                | X                           |                     |
| A5.2 | Hemodynamics                                               |                            |                |                             |                     |
|      | • Cardiac rhythm & heart rate                              |                            |                | X                           |                     |
|      | • BP                                                       |                            |                | X                           |                     |
|      | • Inotropes, vasopressors and doses                        |                            |                | X                           |                     |
| A6   | Reliability (for research study)                           |                            |                |                             |                     |
|      | • Feasibility of echo stated                               |                            |                | X                           |                     |
|      | • Intra-observer variability                               |                            |                |                             |                     |
|      | • Inter-observer variability                               |                            |                | X                           |                     |
|      | • Indicate if observer blinded to treatment, if applicable |                            |                |                             |                     |
| A7   | Statistics (for research study only)                       |                            |                |                             |                     |
|      | • Sample size calculation                                  |                            |                | X                           |                     |
|      | • Indicate if statistician blinded to treatment / group    |                            |                |                             |                     |
|      | • Address confounders, if applicable                       |                            |                | X                           |                     |
|      | • Internal validation provided, if applicable              |                            |                |                             |                     |

<sup>1</sup>Sanfilippo F, Huang S, Herpain A, Balik M, Chew MS, Clau-Terré F, et al. The PRICES statement: an ESICM expert consensus on methodology for conducting and reporting critical care echocardiography research studies. Intensive Care Med 2020. <https://doi.org/10.1007/s00134-020-06262-5>.

Kahl et al.: Diastolic dysfunction and pulmonary edema during sepsis  
Supplemental material 2: PRICES Checklist<sup>1</sup>

|                       |    |                                                                    |   |
|-----------------------|----|--------------------------------------------------------------------|---|
| LV systolic function  | B1 | LV systolic function indices                                       |   |
|                       |    | • LV ejection fraction                                             | X |
|                       |    | • Tissue Doppler S' velocity                                       |   |
|                       |    | • Mitral annular systolic plane excursion (MAPSE)                  |   |
|                       |    | • LV strain or strain rate                                         |   |
|                       | B2 | LV size                                                            |   |
|                       |    | • LV end-diastolic diameter or volume                              |   |
|                       | B3 | Other functional indices to aid interpretation                     |   |
|                       |    | • Cardiac output                                                   | X |
|                       |    | • Stroke volume                                                    | X |
|                       |    | • Any heart valve dysfunction                                      |   |
| RV systolic function  | C1 | RV systolic function indices                                       |   |
|                       |    | • Tricuspid annular systolic plane excursion (TAPSE)               |   |
|                       |    | • RV fractional area change                                        |   |
|                       |    | • Tissue Doppler S' velocity                                       |   |
|                       |    | • LV strain or strain rate                                         |   |
|                       | C2 | RV size and wall thickness                                         |   |
|                       |    | • RV end-diastolic diameter or area                                |   |
|                       |    | • RV:LV end-diastolic area ratio                                   |   |
|                       |    | • RV wall thickness                                                |   |
|                       | C3 | Other functional indices to aid interpretation                     |   |
|                       |    | • PFO or other shunt(s)                                            |   |
|                       |    | • Pericardial effusion                                             |   |
|                       |    | • Paradoxical septal motion                                        |   |
|                       |    | • Inter-atrial septal bowing                                       |   |
|                       |    | • IVC diameter                                                     |   |
| LV diastolic function | D1 | Indices for evaluation of LV diastolic function                    |   |
|                       |    | • E/A ratio                                                        | X |
|                       |    | • Tissue Doppler E' velocity                                       | X |
|                       |    | • E/E' ratio                                                       | X |
|                       |    | • PAP or TR peak velocity                                          | X |
|                       |    | • LA size                                                          | X |
|                       |    | • Mitral E deceleration time                                       |   |
|                       |    | • Pulmonary venous flow                                            |   |
|                       | D2 | Other functional indices to aid interpretation                     |   |
|                       |    | • BP: systolic, diastolic and mean                                 | X |
|                       |    | • Related chronic medications                                      |   |
|                       | D3 | Criteria used for grading diastolic function                       |   |
|                       |    | • State or quote criteria                                          | X |
|                       |    | • Cite reference                                                   | X |
|                       |    | • Technical details of measurements                                | X |
| Fluid management      | E1 | Evaluation of fluid management                                     |   |
|                       |    | • Define the meaning of FR clearly                                 |   |
|                       |    | • State parameter(s) used for predicting fluid responsiveness (FR) |   |
|                       |    | • Describe parameters used to assess FR (e.g. cut-offs)            |   |
|                       | E2 | Other information to aid interpretation (research study only)      |   |
|                       |    | • State reference standard used in diagnostic or validation study  |   |
|                       |    | • State if echo is used to measure the reference value (e.g. CO)   |   |
|                       |    | • State technical information on echo measurements                 |   |
|                       |    | • Describe any procedures used for FR assessment                   |   |

<sup>1</sup>Sanfilippo F, Huang S, Herpain A, Balik M, Chew MS, Clau-Terré F, et al. The PRICES statement: an ESICM expert consensus on methodology for conducting and reporting critical care echocardiography research studies. Intensive Care Med 2020. <https://doi.org/10.1007/s00134-020-06262-5>.

### Supplement 3. Sepsis severity and disease progression

|                             |                                                                                   | 54 patients<br>(122 examinations) |
|-----------------------------|-----------------------------------------------------------------------------------|-----------------------------------|
| <b>Disease progression</b>  |                                                                                   |                                   |
|                             | Maximum SOFA score                                                                | 11 ± 4                            |
|                             | Maximum Lactate (mmol l <sup>-1</sup> )                                           | 3.3 ± 3.3                         |
|                             | Heart rate (bpm)                                                                  | 92 ± 19                           |
|                             | MAP (mmHg)                                                                        | 73 ± 13                           |
|                             | Temperature (°C)                                                                  | 37 ± 1                            |
|                             | Horowitz Index                                                                    | 193 ± 8                           |
|                             | Septic shock <sup>a</sup>                                                         | 54 (44)                           |
| <b>Catecholamines</b>       |                                                                                   |                                   |
|                             | Mean dose of Norepinephrine (µg kg <sup>-1</sup> min <sup>-1</sup> ) <sup>b</sup> | 0.325 ± 0.443                     |
|                             | Norepinephrine (n)                                                                | 109 (89)                          |
|                             | Dobutamine <sup>c</sup> (n)                                                       | 8 (7)                             |
|                             | Adrenaline <sup>c</sup> (n)                                                       | 2 (2)                             |
|                             | No catecholamines (n)                                                             | 13 (11)                           |
| <b>Sedation</b>             |                                                                                   |                                   |
|                             | No sedation (n)                                                                   | 56 (46)                           |
|                             | iv and inhalational sedation (n)                                                  | 56 (46)                           |
|                             | Inhalational sedation (n)                                                         | 6 (5)                             |
|                             | iv sedation                                                                       | 4 (3)                             |
| <b>Ventilation</b>          |                                                                                   |                                   |
|                             | No positive pressure ventilation (n)                                              | 44 (36)                           |
|                             | Positive pressure ventilation (n)                                                 | 78 (64)                           |
|                             | PEEP (mbar) <sup>d</sup>                                                          | 5.6 ± 4.3                         |
| <b>Volume resuscitation</b> |                                                                                   |                                   |
|                             | Fluid balance (litre/24hours)                                                     | 2.5 ± 3.0                         |
|                             | Renal replacement therapy (n)                                                     | 36 (30)                           |
|                             | Medication with diuretics (n)                                                     | 28 (23)                           |

Supplement 3: Data are given in n (%) or mean ± SD. <sup>a</sup>Defined as lactate > 2 mmol/L and vasopressor support<sup>1</sup>. <sup>b</sup>Highest in 24 hours. <sup>c</sup>in addition to norepinephrine. <sup>d</sup>Patients with HFNC received an estimated PEEP of 3 mbar<sup>2</sup>. SOFA score = Sequential organ failure assessment score; HFNC = high flow nasal cannula; MAP = mean arterial pressure; PEEP = positive end-expiratory pressure.

<sup>1</sup> Singer M, Deutschman CS, Seymour CW, Shankar-Hari M, Annane D, Bauer M, et al. The Third International Consensus Definitions for Sepsis and Septic Shock (Sepsis-3). JAMA. 2016 Feb 23;315(8):801.

<sup>2</sup> R. Parke, S. McGuinness, and M. Eccleston, 'Nasal High-Flow Therapy Delivers Low Level Positive Airway Pressure', *British Journal of Anaesthesia* 103, no. 6 (December 2009): 886–90, <https://doi.org/10.1093/bja/aep280>

#### Supplement 4. Sepsis therapy

Patients were treated according to national and international guidelines.<sup>1,2</sup> They received anti-infective medication depending on the suspected microbial spectrum and infection site. Arterial blood pressure was measured continuously in all patients with an arterial catheter. In patients with sepsis-induced tissue hypoperfusion and suspected hypovolemia, crystalloid fluids were administered using the fluid challenge technique.<sup>2</sup> Vasoactive medication (norepinephrine, dobutamine, and epinephrine) was administered with a targeted mean arterial blood pressure above 65mmHg. In patients with renal failure and indication for dialysis such as hypervolemia, hyperkalaemia, or refractory metabolic acidosis, continuous renal replacement therapy was initiated. Patients with hypoxemic respiratory failure received either high-flow oxygen through a nasal cannula (HFNC),<sup>3</sup> non-invasive, or invasive ventilation depending on the severity of the respiratory failure.<sup>4</sup> The positive end-expiratory pressure (PEEP) was titrated according to the recommendations of the acute respiratory distress syndrome (ARDS) network.<sup>5</sup> If sedation was necessary, patients received either propofol, midazolam or inhaled isoflurane with a targeted score of 0 or -1 on the Richmond Agitation and Sedation Scale.<sup>6</sup>

- 
1. Deutsche Sepsis Gesellschaft e. V., Brunkhorst FM, Weigand MA, Pletz M, Gastmeier P, Lemmen SW, et al. S3-Leitlinie Sepsis – Prävention, Diagnose, Therapie und Nachsorge: Langfassung. Med Klin - Intensivmed Notfallmedizin. 2020 May;115(S2):37–109.
  2. Rhodes A, Evans LE, Alhazzani W, Levy MM, Antonelli M, Ferrer R, et al. Surviving Sepsis Campaign: International Guidelines for Management of Sepsis and Septic Shock: 2016. Intensive Care Med. 2017 Mar;43(3):304–77.
  3. Parke R, McGuinness S, Eccleston M. Nasal high-flow therapy delivers low level positive airway pressure. Br J Anaesth. 2009 Dec;103(6):886–90.
  4. Arbeitsgemeinschaft der Wissenschaftlichen Medizinischen Fachgesellschaften (AWMF), Deutsche Gesellschaft für Anästhesiologie und Intensivmedizin (DGAI). S3-Leitlinie Invasive Beatmung und Einsatz extrakorporaler Verfahren bei akuter respiratorischer Insuffizienz. AWMF Leitlinien-Regist Nr 001021. 2017 Dec 4;
  5. The Acute Respiratory Distress Syndrome Network. Ventilation with Lower Tidal Volumes as Compared with Traditional Tidal Volumes for Acute Lung Injury and the Acute Respiratory Distress Syndrome [Internet]. <http://dx.doi.org/10.1056/NEJM200005043421801>. Massachusetts Medical Society; 2009 [cited 2021 Apr 17]. Available from: <https://www.nejm.org/doi/10.1056/NEJM200005043421801>
  6. Ely EW, Truman B, Shintani A, Thomason JWW, Wheeler AP, Gordon S, et al. Monitoring Sedation Status Over Time in ICU Patients: Reliability and Validity of the Richmond Agitation-Sedation Scale (RASS). JAMA. 2003 Jun 11;289(22):2983.

**Supplement 5: Comparison of the prevalence of left ventricular diastolic dysfunction according to different algorithms**

|                                              | 2016 ASE recommendations <sup>3</sup> |                 |                 |                 |                       |
|----------------------------------------------|---------------------------------------|-----------------|-----------------|-----------------|-----------------------|
|                                              | Normal<br>LV diastolic<br>function    | LVDD<br>grade 1 | LVDD<br>grade 2 | LVDD<br>grade 3 | LVDD<br>indeterminate |
| <b>Sepsis-specific algorithm<sup>4</sup></b> |                                       |                 |                 |                 |                       |
| Normal LV diastolic function                 | 35 (29)                               | 29 (24)         | 0 (0)           | 0 (0)           | 10 (8)                |
| LVDD grade 1                                 | 3 (2)                                 | 2 (2)           | 0 (0)           | 0 (0)           | 0 (0)                 |
| LVDD grade 2                                 | 13 (11)                               | 7 (6)           | 0 (0)           | 0 (0)           | 1 (1)                 |
| LVDD grade 3                                 | 3 (2)                                 | 7 (6)           | 5 (4)           | 1 (1)           | 6 (5)                 |

Supplement 5: Data are given in n (%). ASE = American society of echocardiography; LV = left ventricular; LVDD = Left ventricular diastolic dysfunction.

<sup>3</sup> Nagueh SF, Smiseth OA, Appleton CP, Byrd BF, Dokainish H, Edvardsen T, Flachskampf FA, Gillebert TC, Klein AL, Lancellotti P, Marino P, Oh JK, Alexandru Popescu B, Waggoner AD, Houston, Texas; Oslo, Norway; Phoenix, Arizona; Nashville, Tennessee; Hamilton, Ontario, Canada; Uppsala, Sweden; Ghent and Liège, Belgium; Cleveland, Ohio; Novara, Italy; Rochester, Minnesota; Bucharest, Romania; and St. Louis, Missouri. Recommendations for the Evaluation of Left Ventricular Diastolic Function by Echocardiography: An Update from the American Society of Echocardiography and the European Association of Cardiovascular Imaging. Eur Heart J – Cardiovasc Imaging. 2016 Dec;17(12):1321–60.

<sup>4</sup> Lanspa MJ, Gutsche AR, Wilson EL, Olsen TD, Hirshberg EL, Knox DB, Brown SM, Grissom CK. Application of a simplified definition of diastolic function in severe sepsis and septic shock. Crit Care [Internet]. 2016 Dec [cited 2019 Mar 7];20(1). Available from: <http://ccforum.biomedcentral.com/articles/10.1186/s13054-016-1421-3>
